# Supplementary material for: Psychometric properties of the general self-efficacy scale among Thais with type 2 diabetes: a multicenter study
Source: PubMed Central journal article supplement (PMC9135036; doi:10.7717/peerj.13398), 2022-05-23

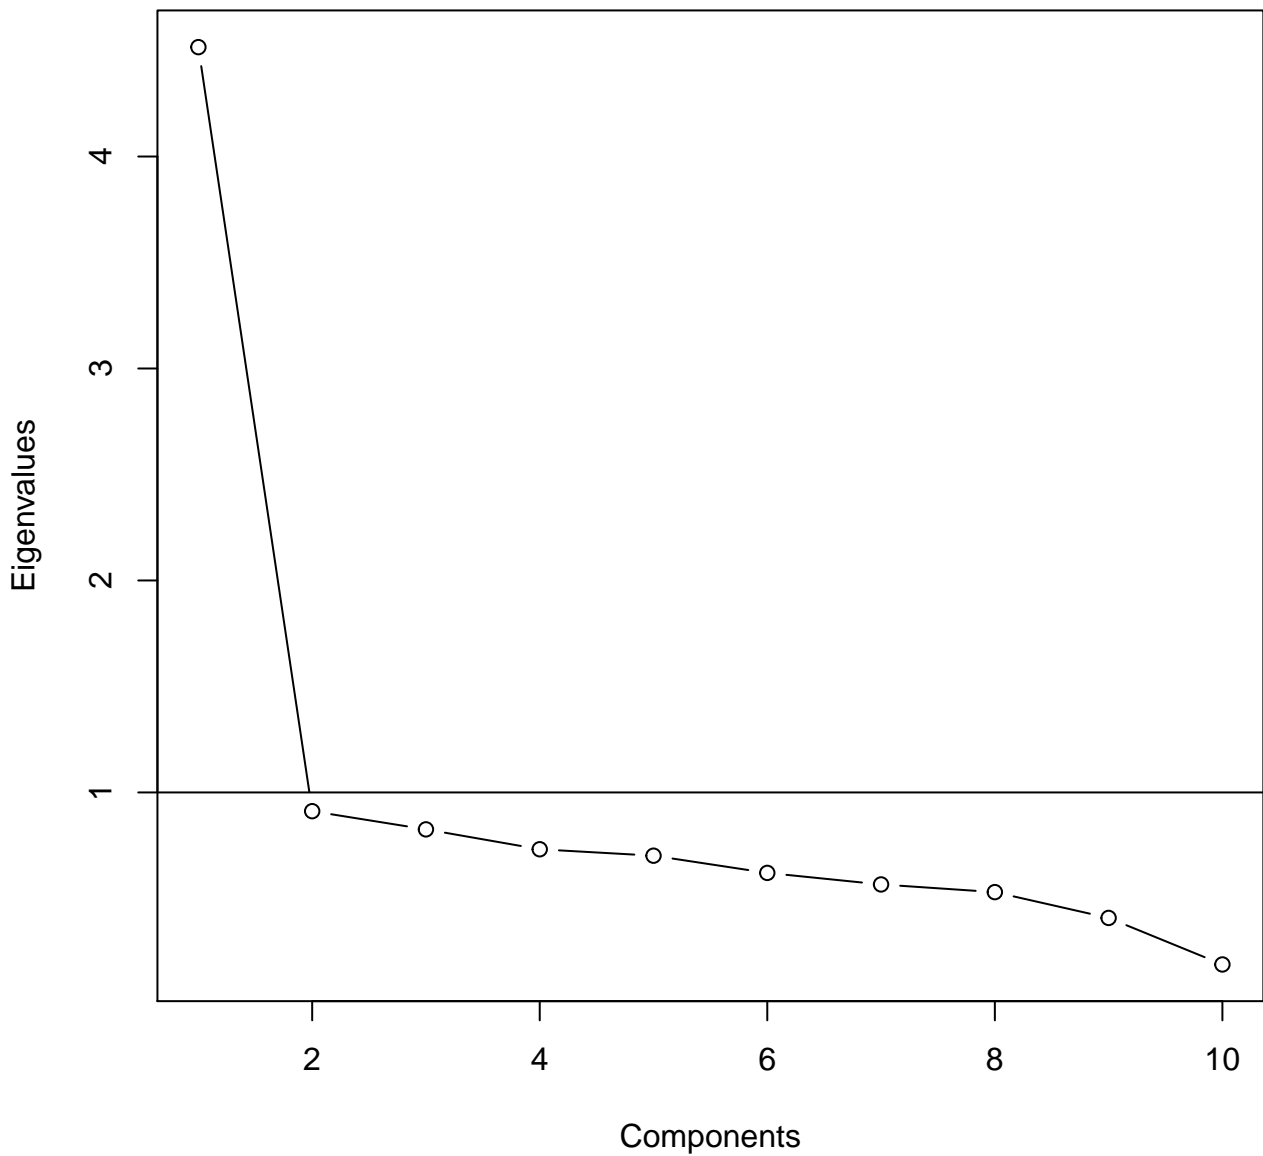

Supplement: peerj-10-13398-s001.pdf [file peerj-10-13398-s001.pdf]
